# Supplementary material for: Exosomes derived from M1 macrophages inhibit the proliferation of the A549 and H1299 lung cancer cell lines via the miRNA-let-7b-5p-GNG5 axis
Source: PeerJ journal article supplement (doi:10.7717/peerj.14608), 2023-01-09
Supplement: other_raw_data.zip [file other_raw_data.zip]

# FACSDiva Version 6.1.3

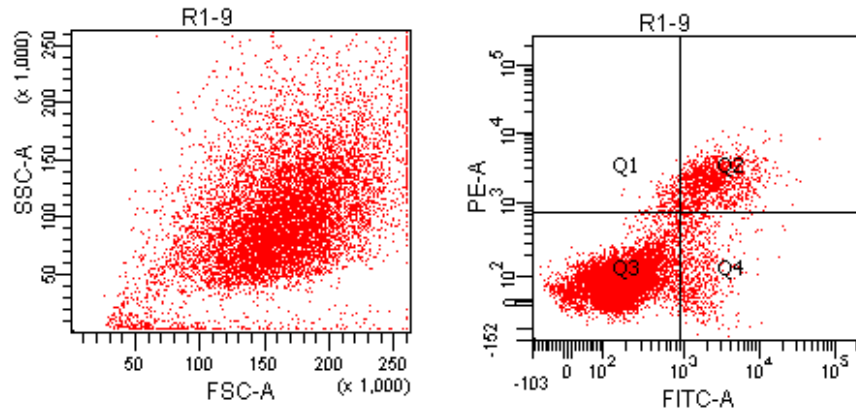

| Tube: R1-9                                     |         |         |        |
|------------------------------------------------|---------|---------|--------|
| Population                                     | #Events | %Parent | %Total |
| <input checked="" type="checkbox"/> All Events | 10,000  | ###     | 100.0  |
| <input checked="" type="checkbox"/> Q1         | 113     | 1.1     | 1.1    |
| <input checked="" type="checkbox"/> Q2         | 1,139   | 11.4    | 11.4   |
| <input checked="" type="checkbox"/> Q3         | 8,029   | 80.3    | 80.3   |
| <input checked="" type="checkbox"/> Q4         | 719     | 7.2     | 7.2    |
