# Supplementary material for: Exosomes derived from M1 macrophages inhibit the proliferation of the A549 and H1299 lung cancer cell lines via the miRNA-let-7b-5p-GNG5 axis
Source: PeerJ journal article supplement (doi:10.7717/peerj.14608), 2023-01-09
Supplement: other_raw_data.zip [file other_raw_data.zip]

# FACSDiva Version 6.1.3

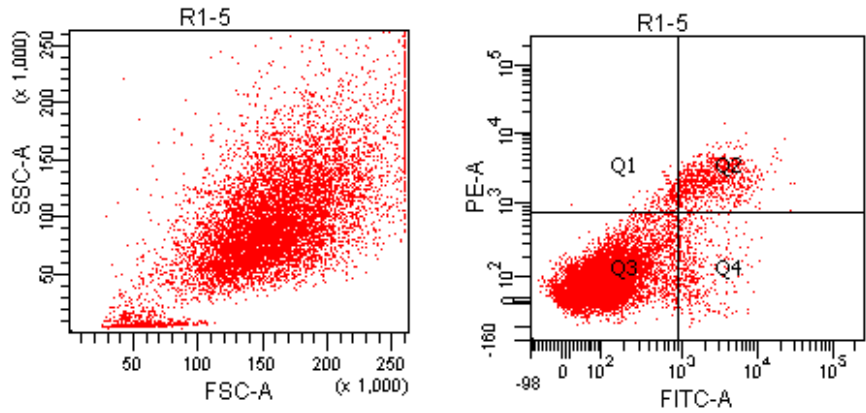

| Tube: R1-5             |         |         |        |
|------------------------|---------|---------|--------|
| Population             | #Events | %Parent | %Total |
| <div></div> All Events | 10,000  | ###     | 100.0  |
| <div></div> Q1         | 114     | 1.1     | 1.1    |
| <div></div> Q2         | 762     | 7.6     | 7.6    |
| <div></div> Q3         | 8,683   | 86.8    | 86.8   |
| <div></div> Q4         | 441     | 4.4     | 4.4    |
