# Supplementary material for: Exosomes derived from M1 macrophages inhibit the proliferation of the A549 and H1299 lung cancer cell lines via the miRNA-let-7b-5p-GNG5 axis
Source: PeerJ journal article supplement (doi:10.7717/peerj.14608), 2023-01-09
Supplement: other_raw_data.zip [file other_raw_data.zip]

# FACSDiva Version 6.1.3

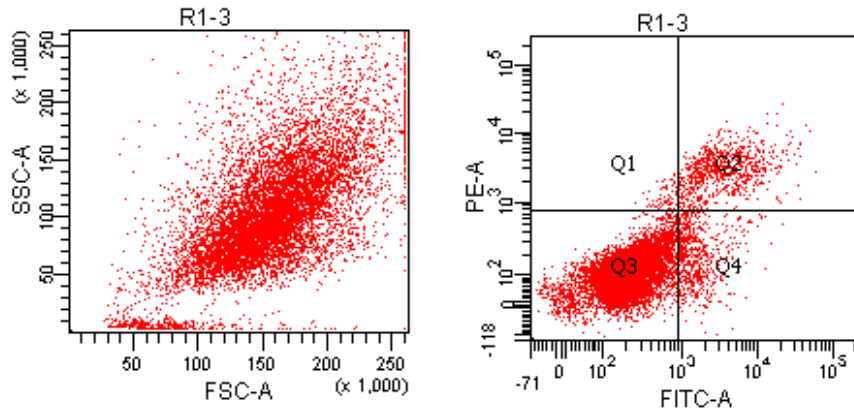

| Tube: R1-3                                     |         |         |        |
|------------------------------------------------|---------|---------|--------|
| Population                                     | #Events | %Parent | %Total |
| <input checked="" type="checkbox"/> All Events | 10,000  | ###     | 100.0  |
| <input checked="" type="checkbox"/> Q1         | 65      | 0.6     | 0.6    |
| <input checked="" type="checkbox"/> Q2         | 856     | 8.6     | 8.6    |
| <input checked="" type="checkbox"/> Q3         | 8,389   | 83.9    | 83.9   |
| <input checked="" type="checkbox"/> Q4         | 690     | 6.9     | 6.9    |
