# Supplementary material for: Exosomes derived from M1 macrophages inhibit the proliferation of the A549 and H1299 lung cancer cell lines via the miRNA-let-7b-5p-GNG5 axis
Source: PeerJ journal article supplement (doi:10.7717/peerj.14608), 2023-01-09
Supplement: other_raw_data.zip [file other_raw_data.zip]

# FACSDiva Version 6.1.3

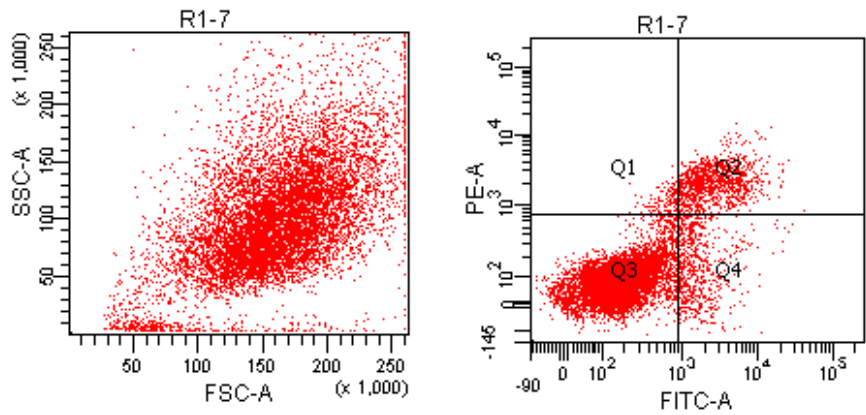

| Tube: R1-7                                                                                                                                                                                                                         |         |         |        |
|------------------------------------------------------------------------------------------------------------------------------------------------------------------------------------------------------------------------------------|---------|---------|--------|
| Population                                                                                                                                                                                                                         | #Events | %Parent | %Total |
| <div style="display: inline-block; width: 10px; height: 10px; background-color: red; border: 1px solid black;"></div> All Events                                                                                                   | 10,000  | ####    | 100.0  |
| <div style="display: inline-block; width: 10px; height: 10px; border: 1px solid black; position: relative;"><div style="position: absolute; top: 50%; left: 50%; transform: translate(-50%, -50%); font-size: 8px;">Q1</div></div> | 109     | 1.1     | 1.1    |
| <div style="display: inline-block; width: 10px; height: 10px; border: 1px solid black; position: relative;"><div style="position: absolute; top: 50%; left: 50%; transform: translate(-50%, -50%); font-size: 8px;">Q2</div></div> | 1,117   | 11.2    | 11.2   |
| <div style="display: inline-block; width: 10px; height: 10px; border: 1px solid black; position: relative;"><div style="position: absolute; top: 50%; left: 50%; transform: translate(-50%, -50%); font-size: 8px;">Q3</div></div> | 8,051   | 80.5    | 80.5   |
| <div style="display: inline-block; width: 10px; height: 10px; border: 1px solid black; position: relative;"><div style="position: absolute; top: 50%; left: 50%; transform: translate(-50%, -50%); font-size: 8px;">Q4</div></div> | 723     | 7.2     | 7.2    |
