# Supplementary material for: Exosomes derived from M1 macrophages inhibit the proliferation of the A549 and H1299 lung cancer cell lines via the miRNA-let-7b-5p-GNG5 axis
Source: PeerJ journal article supplement (doi:10.7717/peerj.14608), 2023-01-09
Supplement: other_raw_data.zip [file other_raw_data.zip]

# FACSDiva Version 6.1.3

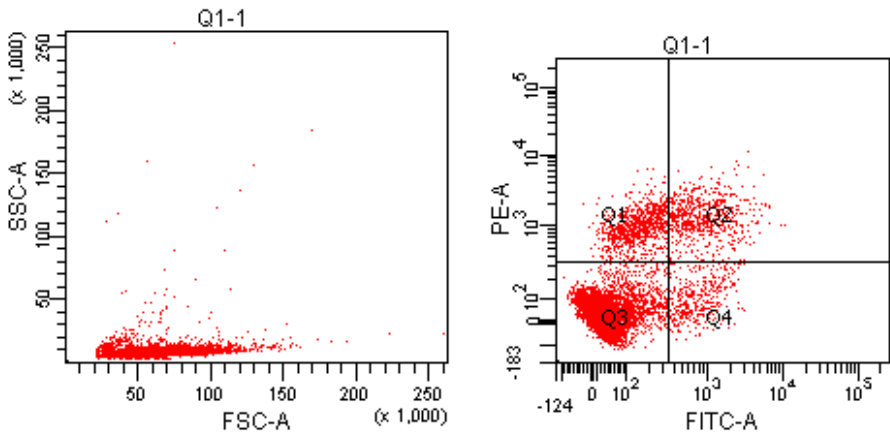

| Tube: Q1-1                                    |         |         |        |
|-----------------------------------------------|---------|---------|--------|
| Population                                    | #Events | %Parent | %Total |
| <span style="color: red;">■</span> All Events | 10,000  | ####    | 100.0  |
| <input checked="" type="checkbox"/> P1        | 348     | 3.5     | 3.5    |
| <input checked="" type="checkbox"/> Q1        | 822     | 8.2     | 8.2    |
| <input checked="" type="checkbox"/> Q2        | 626     | 6.3     | 6.3    |
| <input checked="" type="checkbox"/> Q3        | 8,177   | 81.8    | 81.8   |
| <input checked="" type="checkbox"/> Q4        | 375     | 3.8     | 3.8    |
